# Supplementary material for: Prediction of single-layer TiVI6 as a promising two-dimensional valleytronic semiconductor with spontaneous valley polarization
Source: Royal Society of Chemistry journal article supplement (doi:10.1039/d0tc03485a), 2020-01-01
Supplement: d0tc03485a1.pdf [file d0tc03485a1.pdf]

## Supplementary Information for

# Prediction of single-layer $\text{TiVI}_6$ as a promising two-dimensional valleytronic semiconductor with spontaneous valley polarization

Wenhui Du, Yandong Ma\*, Rui Peng, Hao Wang, Baibiao Huang, Ying Dai\*

School of Physics, State Key Laboratory of Crystal Materials, Shandong University, Shandan Street 27, Jinan 250100, China

\*Corresponding author: [yandong.ma@sdu.edu.cn](mailto:yandong.ma@sdu.edu.cn) (Y.M.); [daiy60@sina.com](mailto:daiy60@sina.com) (Y.D.)

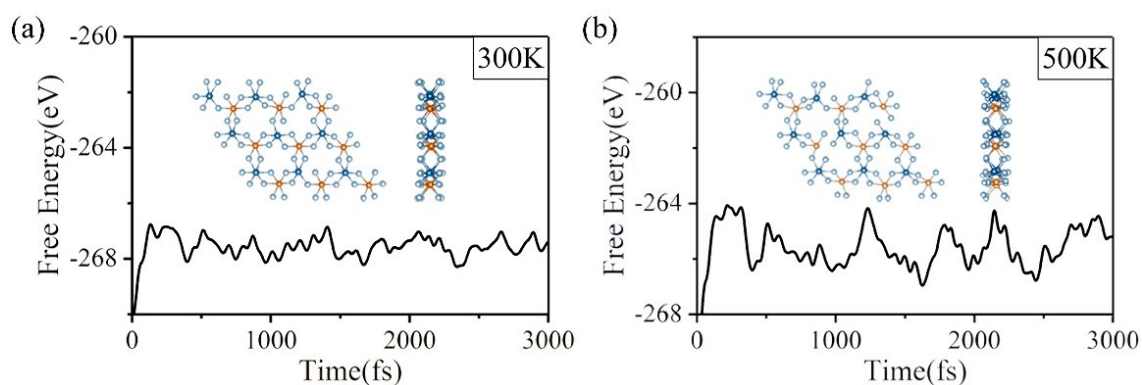

**FIG. S1.** The molecular dynamic (MD) simulation results of SL  $\text{TiVI}_6$  at (a) 300K and (b) 500K. Insets are the top and side views of SL  $\text{TiVI}_6$  structure after MD simulation. The well-preserved structures and small free-energy fluctuation indicate SL  $\text{TiVI}_6$  remains stable at 300K and 500K.

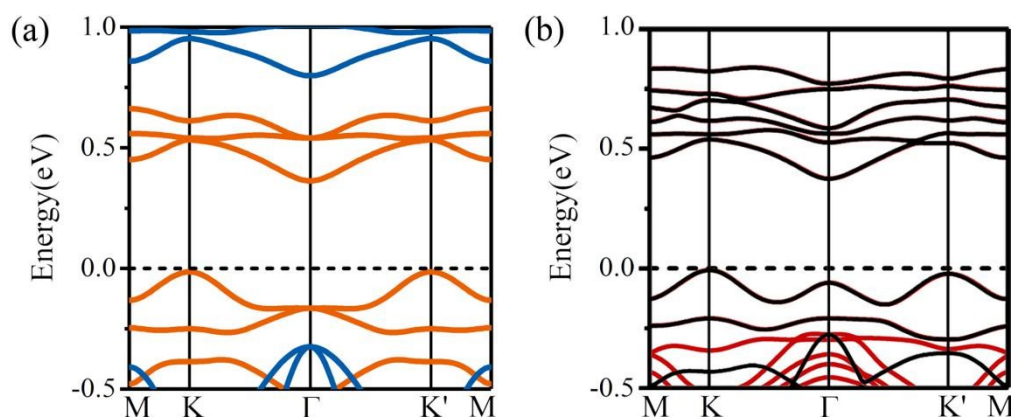

**FIG. S2.** Spin-polarized band structure of SL  $\text{TiVI}_6$  (a) without and (b) with SOC based on PBE+U

and wannier function. The orange and blue lines in (a) correspond to spin-up and spin-down states, respectively. The black and red lines in (b) correspond to PBE+U and wannier function, respectively. The Fermi level is set to 0 eV.

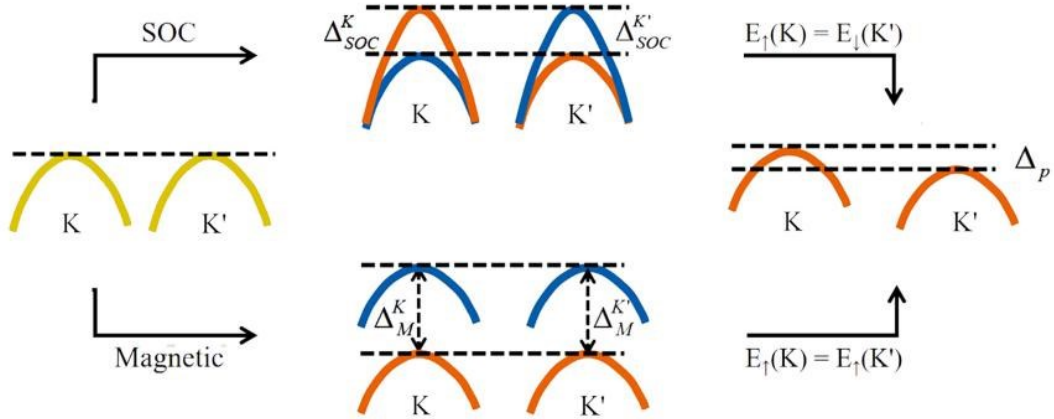

**FIG. S3.** Schematic diagram of the evaluation of top valence bands under SOC and magnetic exchange interaction.

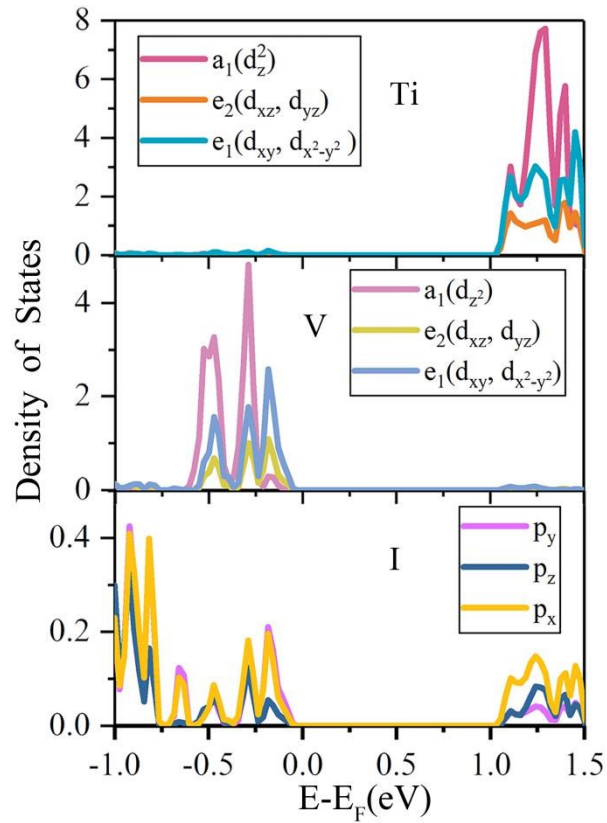

**FIG. S4.** Density of states of SL TiVI<sub>6</sub>.

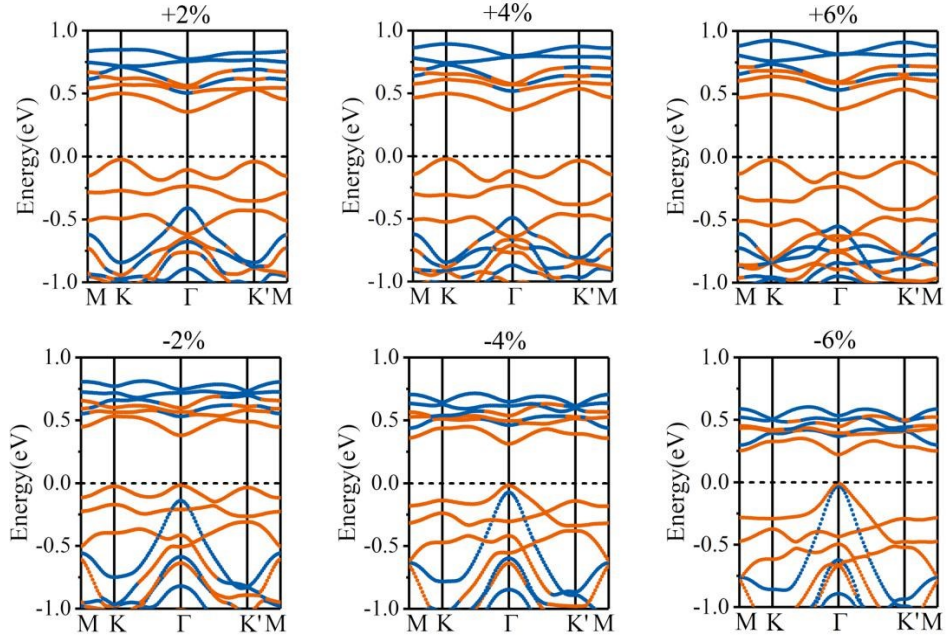

**FIG. S5.** Spin polarized band structure of SL  $\text{TiVI}_6$  under various strains based on PBE+U. The orange and blue lines correspond to spin-up and spin-down states, respectively. The Fermi level is set to 0 eV.
